# Supplementary material
Source: Springer Nature journal article supplement (https://www.springermedizin.de/resource/supplementary/12911_2010_368_MOESM2_ESM.pdf/9525586)
Supplement: MOESM2 [file 9525586]

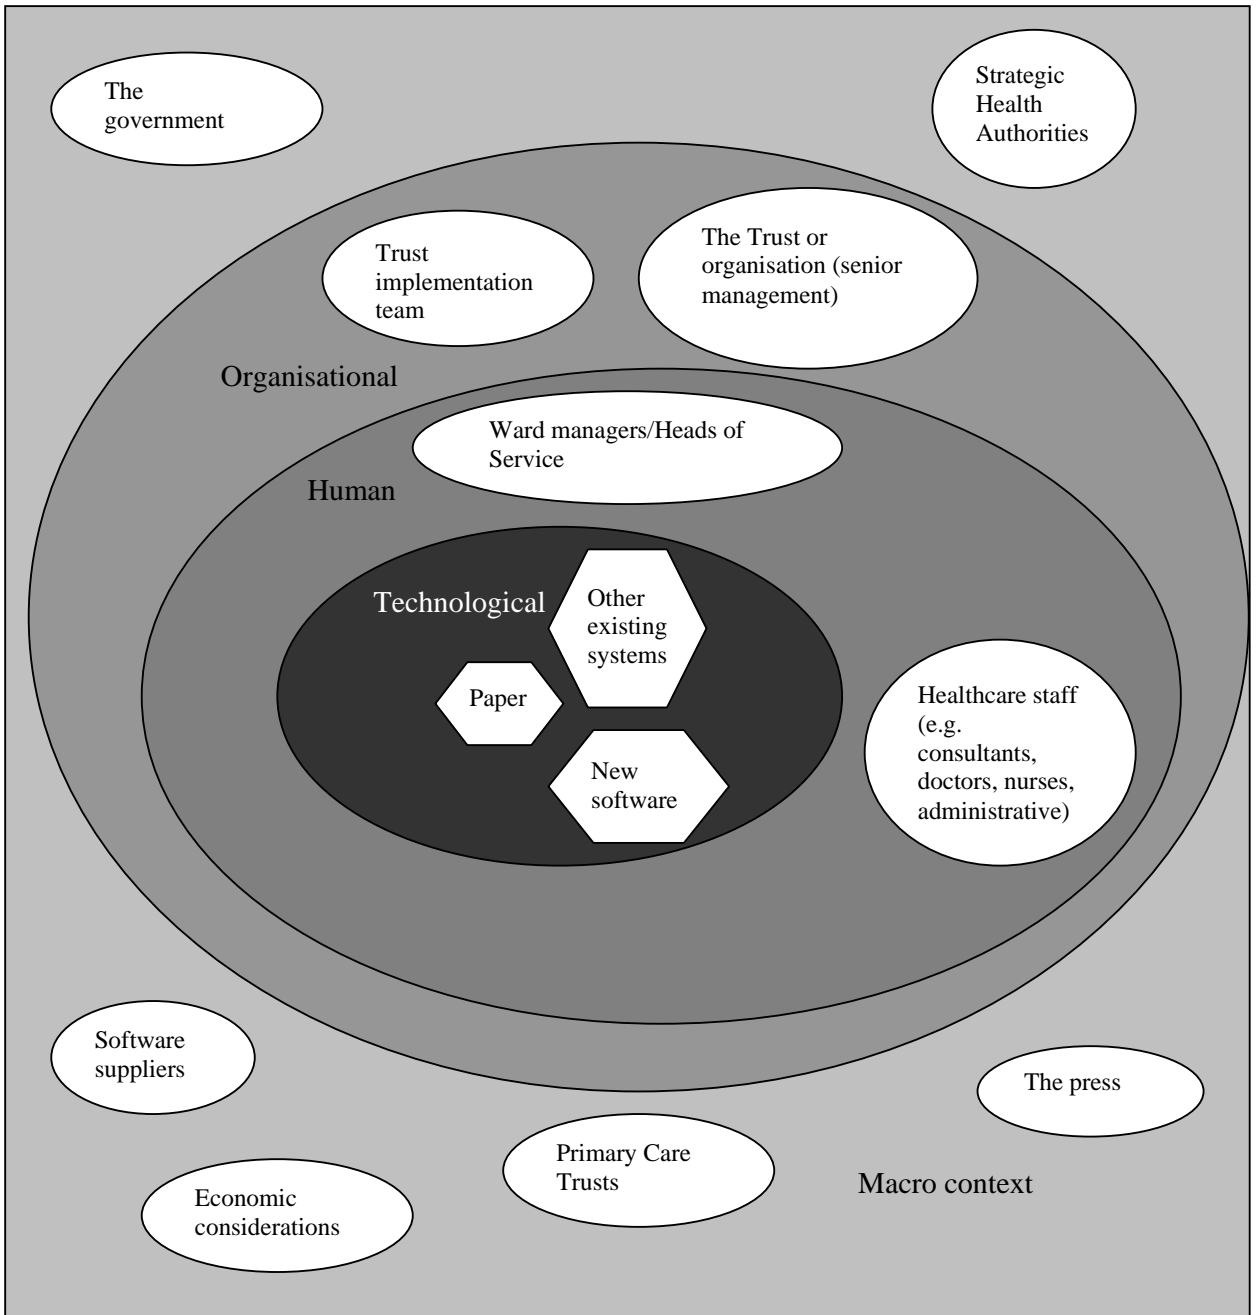

The government

Strategic Health Authorities

Trust implementation team

The Trust or organisation (senior management)

Organisational

Ward managers/Heads of Service

Human

Technological

Other existing systems

Paper

New software

Healthcare staff (e.g. consultants, doctors, nurses, administrative)

Software suppliers

The press

Economic considerations

Primary Care Trusts

Macro context
